# Supplementary material
Source: Frontiers journal article supplement (https://www.frontiersin.org/articles/408351)
Supplement: Table_2.DOCX [file Table_2.DOCX]

*Figure 1.* Graphical representation of the 6-cluster solution in two samples.

*
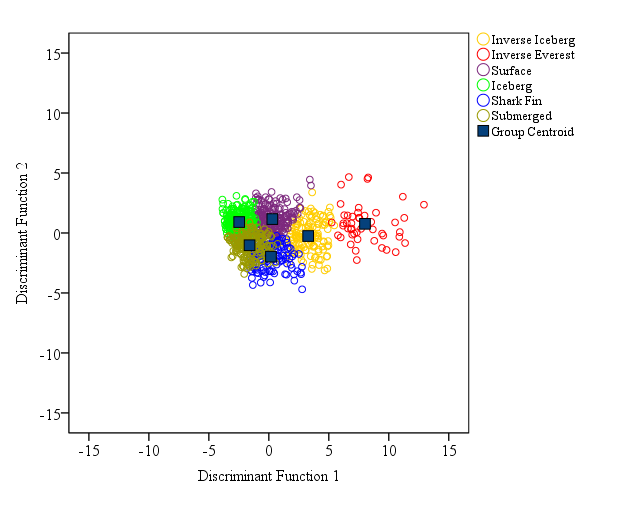
*

*Figure 2.* Distribution of cases in Dataset 1 (*N =* 929) for Functions 1 and 2.
