# Supplementary material
Source: Frontiers journal article supplement (https://www.frontiersin.org/articles/408351)
Supplement: Table_3.DOCX [file Table_3.DOCX]

Table 1

*Cluster Centroids from Dataset 2 (N = 2,364) Applied to Dataset 1 (N = 929)*

| Mood  Dimension | Cluster | | | | | |
| --- | --- | --- | --- | --- | --- | --- |
| 1 | 2 | 3 | 4 | 5 | 6 |
| Tension  Depression  Anger  Vigour  Fatigue | 1.15  .25  .41  10.62  2.39 | 10.42  11.19  10.23  4.69  11.83 | 6.34  5.11  4.52  5.98  8.59 | 1.75  1.26  .95  4.14  9.97 | 1.29  .59  .48  4.72  2.91 | 4.58  1.69  2.26  9.10  4.76 |
| Confusion | .54 | 10.75 | 5.84 | 1.32 | .90 | 3.27 |

*Note.* 1 = Iceberg Profile, 2 = Inverse Everest Profile, 3 = Inverse Iceberg Profile, 4 = Shark Fin Profile, 5 = Submerged Profile, 6 = Surface Profile. Centroids are raw scores.

Table 2

*Descriptive Statistics of the 6-Cluster Solution in Dataset 1 (N = 929)*

| Mood  Dimension | Iceberg Profile (*n* = 233) | | | Inverse Everest Profile (*n* = 47) | | | Inverse Iceberg Profile (*n* = 133) | | |
| --- | --- | --- | --- | --- | --- | --- | --- | --- | --- |
| *M* | *SD* | 95% CI | *M* | *SD* | 95% CI | *M* | *SD* | 95% CI |
| Tension | 42.83 | 3.86 | [42.33, 43.33] | 73.91 | 6.59 | [71.98, 75.85] | 61.07 | 6.87 | [59.89, 62.25] |
| Depression | 44.02 | 3.21 | [43.61, 44.44] | 76.60 | 11.54 | [73.21, 79.98] | 58.87 | 9.02 | [57.32, 60.42] |
| Anger | 44.11 | 3.70 | [43.63, 44.59] | 74.30 | 10.97 | [71.08, 77.53] | 59.21 | 9.64 | [57.56, 60.87] |
| Vigour | 58.53 | 5.79 | [57.78, 59.27] | 45.54 | 10.35 | [42.50, 48.58] | 44.96 | 9.04 | [43.41, 46.51] |
| Fatigue | 42.34 | 4.95 | [41.70, 42.98] | 64.06 | 10.67 | [60.93, 67.20] | 57.80 | 8.69 | [56.31, 59.29] |
| Confusion | 44.28 | 3.81 | [43.79, 44.77] | 75.09 | 9.80 | [72.21, 77.97] | 58.04 | 9.53 | [56.40, 59.67] |
| Mood  Dimension | Shark Fin Profile (*n* = 122) | | | Submerged Profile (*n* = 197) | | | Surface Profile (*n* = 197) | | |
| *M* | *SD* | 95% CI | *M* | *SD* | 95% CI | *M* | *SD* | 95% CI |
| Tension | 47.36 | 6.15 | [46.25, 48.46] | 43.84 | 4.58 | [43.19, 44.48] | 53.48 | 6.03 | [52.63, 54.33] |
| Depression | 49.06 | 6.38 | [47.91, 50.20] | 45.79 | 5.10 | [45.07, 46.50] | 49.88 | 6.72 | [48.94, 50.83] |
| Anger | 48.08 | 6.84 | [46.86, 49.31] | 45.13 | 5.14 | [44.40, 45.85] | 51.14 | 6.84 | [50.18, 52.10] |
| Vigour | 43.73 | 7.44 | [42.39, 45.06] | 42.12 | 6.31 | [41.24, 43.01] | 55.96 | 7.21 | [54.94, 56.97] |
| Fatigue | 62.24 | 6.48 | [61.08, 63.40] | 45.86 | 5.33 | [45.11, 46.61] | 47.12 | 6.26 | [46.24, 48.00] |
| Confusion | 45.97 | 5.15 | [45.05, 46.89] | 45.14 | 4.47 | [44.51, 45.77] | 52.94 | 8.03 | [51.81, 54.06] |

Table 3

*Descriptive Statistics of the 6-Cluster Solution in Dataset 2 (N = 2,364)*

| Mood  Dimension | Iceberg Profile (*n* = 695) | | | Inverse Everest Profile (*n* = 64) | | | Inverse Iceberg Profile (*n* = 244) | | |
| --- | --- | --- | --- | --- | --- | --- | --- | --- | --- |
| *M* | *SD* | 95% CI | *M* | *SD* | 95% CI | *M* | *SD* | 95% CI |
| Tension | 42.84 | 3.59 | [42.58, 43.11] | 67.70 | 8.64 | [65.54, 69.86] | 56.65 | 7.64 | [55.69, 57.61] |
| Depression | 44.98 | 2.58 | [44.79, 45.17] | 87.17 | 11.95 | [84.19, 90.16] | 63.86 | 9.95 | [62.61, 65.11] |
| Anger | 46.26 | 2.69 | [46.06, 46.47] | 79.05 | 10.81 | [76.35, 81.75] | 59.82 | 9.20 | [58.66, 60.98] |
| Vigour | 57.33 | 5.32 | [56.93, 57.73] | 42.50 | 10.64 | [39.84, 45.16] | 45.73 | 7.54 | [44.77, 46.68] |
| Fatigue | 45.72 | 4.69 | [45.37, 46.07] | 68.80 | 7.23 | [67.02, 70.58] | 60.80 | 8.38 | [59.74, 61.85] |
| Confusion | 44.80 | 3.38 | [44.55, 45.05] | 80.39 | 11.22 | [77.59, 83.19] | 63.20 | 8.23 | [62.16, 64.24] |
| Mood  Dimension | Shark Fin Profile (*n* = 409) | | | Submerged Profile (*n* = 603) | | | Surface Profile (*n* = 349) | | |
| *M* | *SD* | 95% CI | *M* | *SD* | 95% CI | *M* | *SD* | 95% CI |
| Tension | 44.42 | 5.23 | [43.91, 44.92] | 43.23 | 4.18 | [42.89, 43.56] | 51.90 | 6.10 | [51.26, 52.54] |
| Depression | 48.97 | 6.67 | [48.32, 49.62] | 46.34 | 4.75 | [45.96, 46.72] | 50.68 | 7.14 | [49.93, 51.43] |
| Anger | 48.00 | 4.58 | [47.55, 48.45] | 46.50 | 3.14 | [46.25, 46.75] | 52.26 | 7.02 | [51.52, 53.00] |
| Vigour | 41.12 | 6.58 | [40.48, 41.76] | 42.52 | 4.67 | [42.15, 42.89] | 53.51 | 6.34 | [52.85, 54.18] |
| Fatigue | 64.16 | 6.22 | [63.55, 64.76] | 46.99 | 4.51 | [46.63, 47.35] | 51.46 | 5.85 | [50.84, 52.07] |
| Confusion | 47.47 | 5.59 | [46.93, 48.02] | 45.99 | 4.65 | [45.61, 46.36] | 54.20 | 7.16 | [53.44, 54.95] |

Table 4

*Discriminant Functions for Dataset 1 (N = 929) and Dataset 2 (N = 2,364)*

| Discriminant  Function | Eigenvalue | | % of Variance | | Cumulative % | | Canonical Correlation | |
| --- | --- | --- | --- | --- | --- | --- | --- | --- |
| Dataset 1 | |  | |  | |  | |  | |
| 1 | | 6.935 | | 80.8 | | 80.8 | | .935 | |
| 2 | | 1.276 | | 14.9 | | 95.7 | | .749 | |
| 3 | | 0.310 | | 3.6 | | 99.3 | | .487 | |
| 4 | | 0.056 | | 0.7 | | 99.9 | | .230 | |
| 5 | | 0.005 | | 0.1 | | 100.0 | | .069 | |
| Dataset 2 | |  | |  | |  | |  | |
| 1 | | 5.678 | | 71.3 | | 71.3 | | .922 | |
| 2 | | 1.693 | | 21.3 | | 92.5 | | .793 | |
| 3 | | 0.498 | | 6.2 | | 98.8 | | .576 | |
| 4 | | 0.094 | | 1.2 | | 99.9 | | .293 | |
| 5 | | 0.004 | | 0.1 | | 100.0 | | .067 | |

Table 5

*Structure Matrix for Dataset 1 (N = 929) and Dataset 2 (N = 2,364)*

| Mood  Dimension | Structure Matrix | | | | |
| --- | --- | --- | --- | --- | --- |
| 1 | 2 | 3 | 4 | 5 |
| Dataset 1 |  |  |  |  |  |
| Tension | .574 | .254 | –.085 | –.662* | –.309 |
| Depression | .453 | .057 | –.115 | .702* | –.295 |
| Anger | .425 | .129 | –.094 | .239 | –.455* |
| Vigour | –.132 | .739* | .631 | .048 | –.114 |
| Fatigue | .348 | –.542 | .741* | –.102 | .149 |
| Confusion | .427 | .264 | –.212 | .139 | .826* |
| Dataset 2 |  |  |  |  |  |
| Tension | .445 | .268 | –.063 | –.691* | –.126 |
| Depression | .560 | .149 | –.169 | .673* | –.303 |
| Anger | .494 | .234 | –.114 | .259 | .781* |
| Vigour | –.176 | .728* | .663 | .012 | .015 |
| Fatigue | .444 | –.545 | .706* | –.082 | .015 |
| Confusion | .546* | .250 | –.155 | –.255 | –.404 |

*Note.* *Largest absolute correlation between each variable and any discriminant function.

Table 6

*Cluster Classifications for Dataset 1 (N = 929)*

|  | Predicted Group Membership | | | | | |  |
| --- | --- | --- | --- | --- | --- | --- | --- |
| Cluster | 1 | 2 | 3 | 4 | 5 | 6 | *n* |
| Iceberg | 231 | 0 | 0 | 0 | 1 | 1 | 233 |
| Inverse Everest | 0 | 45 | 2 | 0 | 0 | 0 | 47 |
| Inverse Iceberg | 0 | 0 | 130 | 0 | 0 | 3 | 133 |
| Shark Fin | 2 | 0 | 1 | 106 | 9 | 4 | 122 |
| Submerged | 9 | 0 | 0 | 0 | 186 | 2 | 197 |
| Surface | 1 | 0 | 1 | 0 | 1 | 194 | 197 |

*Note.* 1 = Iceberg Profile, 2 = Inverse Everest Profile, 3 = Inverse Iceberg Profile, 4 = Shark Fin Profile, 5 = Submerged Profile, 6 = Surface Profile.

Table 7

*Distribution of Mood Profile Clusters by Gender and Age Group for Dataset 1 (N = 929) and Dataset 2 (N = 2,364)*

|  | Cluster | | | | | |
| --- | --- | --- | --- | --- | --- | --- |
| Source | 1 | 2 | 3 | 4 | 5 | 6 |
| Gender |  |  |  |  |  |  |
| Male1 | 96†+ | 8*- | 31 | 25*- | 53 | 62 |
| Female1 | 136†- | 39*+ | 101 | 97*+ | 143 | 132 |
| Male2 | 406†+ | 33 | 107*- | 196 | 288*- | 189 |
| Female2 | 289†- | 31 | 137*+ | 213 | 315*+ | 160 |
| Age Group (yr.) |  |  |  |  |  |  |
| 18–241 | 113†- | 29 | 85 | 84*+ | 117 | 128*+ |
| 25–351 | 72*+ | 14 | 31 | 28 | 49 | 46 |
| 36–451 | 16*+ | 2 | 4 | 2 | 12 | 4 |
| 46–551 | 11*+ | 0 | 3 | 1 | 7 | 2 |
| 56–651 | 5*+ | 0 | 0 | 0 | 4 | 0 |
| 18–242 | 358†- | 29*- | 151 | 274§+ | 374 | 230*+ |
| 25–352 | 110 | 22†+ | 33 | 54 | 89 | 48 |
| 36–452 | 138†+ | 7 | 35 | 55 | 79 | 39*- |
| 46–552 | 46 | 3 | 19 | 15*- | 35 | 20 |
| 56–652 | 38§+ | 1 | 5 | 10 | 24 | 9 |
| > 652 | 5 | 2§+ | 1 | 1 | 2 | 3 |

*Note.* 1 = Iceberg Profile, 2 = Inverse Everest Profile, 3 = Inverse Iceberg Profile, 4 = Shark Fin Profile, 5 = Submerged Profile, 6 = Surface Profile. 1 = Dataset 1 (gender: *N* = 923; age group: *N* = 869), 2 = Dataset 2 (*N* = 2,364). + = over-represented, - = under-represented. * *p* < .05, § *p* < .01, † *p* < .001.
